# Supplementary material for: Structural and Biochemical Studies of Bacillus subtilis MobB
Source: MDPI journal article supplement (doi:10.3390/cryst11101262), 2021-10-18
Supplement: s1 [file s1]

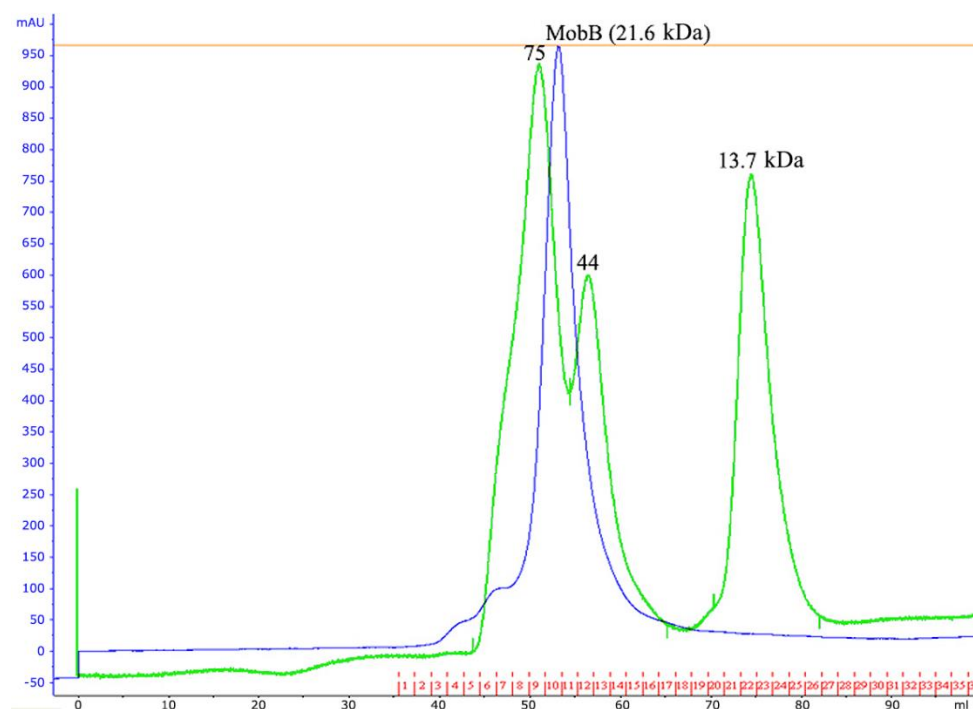

**Figure S1.** Superdex75 size-exclusion column profile of *B. subtilis* MobB (blue) and calibration standards (green). The molecular weights of the standard proteins are indicated in kDa.

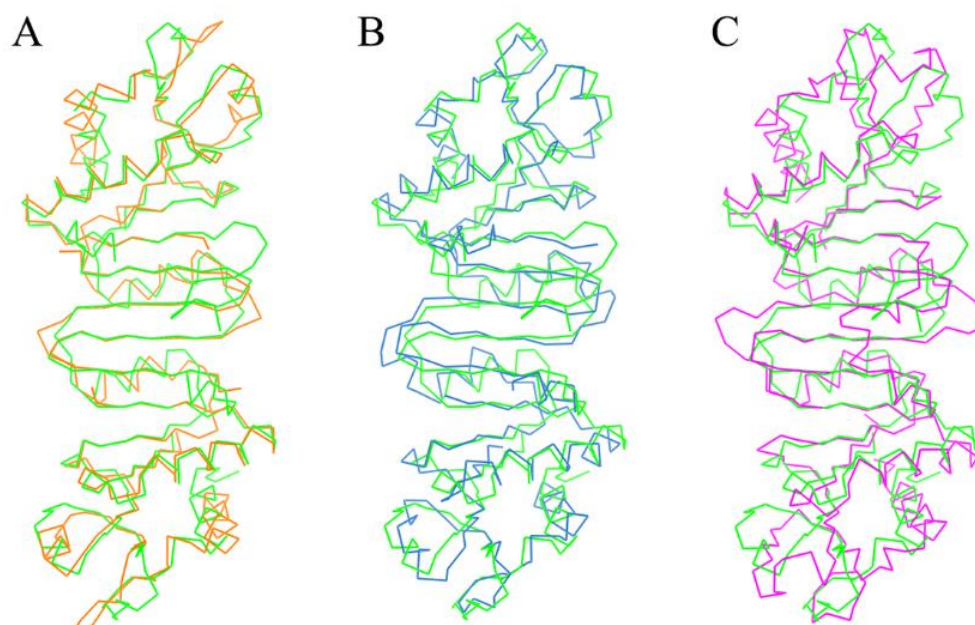

**Figure S2.** The structure of *B. subtilis* MobB (green) is superposed to (A) *G. stearothermophilus* (or-orange), (B) *A. fulgid* (blue), and (C) *E. coli* MobB (magenta).
